# Supplementary material
Source: publisher site journal article supplement (https://www.dovepress.com/article/557424)
Supplement: Supplementary file 1 [file 557424%20Supplementary%20Material.doc]

| **Table S1.** Comparison of PSQI scores in MHD patients with different potential categories [M(P25, P75)] | | | | | | | |
| --- | --- | --- | --- | --- | --- | --- | --- |
| Latent  categories | subjective  sleep quality | sleep  latency | sleep  duration | sleep  efficiency | sleep  disturbances | use of sleep  medication | daytime  dysfunction |
| Class 1 | 0.00(0.00,1.00) | 1.00(0.00,1.00) | 0.00(0.00,1.00) | 0.00(0.00,2.00) | 1.00(1.00,1.00) | 0.00(0.00,0.00) | 1.00(0.00,2.00) |
| Class 2 | 3.00(2.00,3.00) | 2.00(1.00,3.00) | 3.00(3.00,3.00) | 3.00(3.00,3.00) | 1.00(1.00,2.00) | 0.00(0.00,0.00) | 3.00(2.00,3.00) |
| Class 3 | 3.00(3.00,3.00) | 2.00(2.00,3.00) | 3.00(3.00,3.00) | 3.00(3.00,3.00) | 1.00(1.00,2.00) | 3.00(2.00,3.00) | 3.00(1.50,3.00) |

| **Table S2.** Comparison of SIS scores in MHD patients with different potential categories of sleep quality[M(P25, P75)] | | | | | |
| --- | --- | --- | --- | --- | --- |
| Latent  categories | SIS scores | Social exclusion  dimension | Economic hardship  dimension | Internalized shame  dimension | Social isolation  dimension |
| Class1 | 57.00(52.00, 62.00) | 19.00(18.00, 20.00) | 7.00(6.00, 9.00) | 12.00(12.00, 13.00) | 18.00(16.00, 20.00) |
| Class2 | 59.00(55.00, 63.00) | 19.00(18.00, 21.00) | 8.00(6.00, 9.00) | 12.00(12.00, 13.00) | 19.00(17.00, 21.00) |
| Class3 | 63.00(59.00, 67.00) | 19.00(19.00, 22.00) | 8.00(8.00, 9.00) | 12.00(14.00, 15.00) | 19.00(18.00, 22.00) |
| *Kruskal-Wallis* | 24.820 | 6.994 | 9.212 | 19.593 | 18.381 |
| *P* | < 0.001 | 0.030 | 0.010 | < 0.001 | < 0.001 |
| Note: Bold indicates *P* < 0.05. | | | | | |
